# Supplementary material for: Intrinsically active variants of Erk oncogenically transform cells and disclose unexpected autophosphorylation capability that is independent of TEY phosphorylation
Source: PubMed Central journal article supplement — Mol Biol Cell. 2016 Mar 15;27(6):1026–39. doi: 10.1091/mbc.E15-07-0521 (PMC4791124; doi:10.1091/mbc.e15-07-0521), 2016-03-15
Supplement: supp_E15-07-0521v1_CombinedSupMats.pdf [file supp_E15-07-0521v1_CombinedSupMats.pdf]

# Supplemental Materials

*Molecular Biology of the Cell*

Smorodinsky-Atias et al.

## Supplementary Materials

### **Materials and Methods**

#### **Crystallization, data collection, and solving the crystal structure of Erk variants**

Crystals of Erk2(WT) and Erk2(R65S) proteins were obtained by the microbatch method using the ORYX6 (Douglas Instruments Ltd.) automated crystallization system. Crystals appeared under two main conditions. The first contained protein solution (2.3-2.5 mg/ml) and 61 mM Ammonium Sulfate, 100mM Bis Tris pH 7.0, 12-15% (v/v) PEG 3350. The second contained 2.0-3.75 mg/ml protein, 61 mM Ammonium Sulfate, 100mM Bis Tris pH 7.0, 12-18% (v/v) PEG 4000. For data collection, crystals were soaked in cryoprotectant solution containing the crystallization solution and 15% glycerol and mounted on a MiTeGen cryoloop. Crystallographic data for Erk2(WT) and Erk2(R65S) were collected at 100 K using an Oxford Cryostream cooling device from a single crystal on an ADSC Quantum 315R CCD detector with an oscillation range of 1.0° at beam lines ID23-1 and ID14-4 at the European Synchrotron Radiation Facility (ESRF), Grenoble, France. The crystals belonged to the monoclinic space group  $P2_1$  with one Erk2 molecule in the asymmetric unit. Data were integrated, reduced and scaled using the HKL suite (Otwinowski and Minor, 1997). Crystals of the Erk2(WT) and Erk2(R65S) complexed with the ATP analogue AMP-PNP (Adenosine 5'-( $\beta,\gamma$ -imido)triphosphate tetralithium salt hydrate) (Sigma A2647) were obtained via soaking the compound into the crystals. For that crystals were transferred into a solution containing either 100mM Tris pH 7.4, 2mM  $MgCl_2$ , 10mM AMP-PNP for 4 hours, or 100mM Bis Tris pH 7.0, 60mM Ammonium Sulfate, 18% PEG 3350, 2mM  $MgCl_2$ , 10mM AMP-PNP for 16-18 hours. Prior to data collection crystals of the AMP-PNP complex were treated with a

cryoprotectant solution, similar to that described above, and subsequently flash frozen. Crystallographic data were collected at the ESRF at ID14-4. Data were integrated and scaled using the HKL suite. The structures of all proteins were solved via molecular replacement methods using Molrep (Murshudov *et al.*, 1997) implemented in CCP4i suite (Potterton *et al.*, 2003) using the Erk2 structure (1ERK) as the search model after removing all solvent molecules. Following molecular replacement, the models were refined using rigid body and then restrained options REFMAC5 (Murshudov *et al.*, 1997). Solvent molecules were added utilizing ARP/WARP (Lamzin and Wilson, 1993). The models were fitted into electron-density maps using the graphics program Coot (Emsley and Cowtan, 2004).

**Table 1a:** Data collection and current refinement statistics for Erk2(WT), and Erk2(R65S)

|                                             | <b>Erk2</b>                         | <b>Erk2(R65S)</b>                   |
|---------------------------------------------|-------------------------------------|-------------------------------------|
| ESRF beamline                               | ID23-1                              | ID29                                |
| Wavelength (Å)                              | 0.98                                | 0.93                                |
| RCSB entry                                  | 4S31                                | 4S2Z                                |
| Space Group                                 | P2 <sub>1</sub>                     | P2 <sub>1</sub>                     |
| Unit Cell Parameters (Å)                    | a=48.8 b=70.2<br>c=60.7<br>β=109.6° | a=48.8 b=70.1<br>c=61.0<br>β=109.7° |
| Resolution range<br>(last resolution shell) | 50.0-1.45<br>(1.48-1.45)            | 50-1.48<br>(1.53-1.48)              |
| Unique Reflections                          | 66,668                              | 60,954                              |
| Redundancy                                  | 3.7                                 | 4.3                                 |
| Rsym(I) <sup>a</sup> (%)                    | 5.0 (65.4)                          | 5.7 (47.2)                          |
| Completeness                                | 97.2 (95.3)                         | 96.2 (84.3)                         |
| I/σ                                         | 40.9 (1.9)                          | 44.4 (1.7)                          |
| Number of protein atoms                     | 2823                                | 2811                                |
| Number of solvent atoms                     | 210                                 | 324                                 |
| R-factor                                    | 20.8                                | 19.5                                |
| R-free <sup>b</sup>                         | 23.9                                | 22.1                                |
| Protein                                     | 30.2                                | 34.6                                |
| Solvent                                     | 34.2                                | 42.4                                |
| Bond Length (Å)                             | 0.013                               | 0.014                               |
| Bond Angle (°)                              | 1.63                                | 1.71                                |
| Favored (%)                                 | 96.5                                | 95.0                                |
| Allowed (%)                                 | 3.5                                 | 5.0                                 |
| Disallowed (%)                              | 0.0                                 | 0.0                                 |

<sup>a</sup>Rsym(I) =  $\frac{\sum |I - \langle I \rangle|}{\sum I}$ , <sup>b</sup>Test set consists of 5% for all data.

**Table 1b:** Data collection and refinement statistics for Erk2(WT), and Erk2(R65S) in complex with PNP AMP-(ANP).

|                                             | <b>Erk2-ANP</b>                      | <b>Erk2(R65S)-ANP</b>               |
|---------------------------------------------|--------------------------------------|-------------------------------------|
| ESRF beamline                               | ID14-4                               | ID14-4                              |
| Wavelength (Å)                              | 0.94                                 | 0.94                                |
| RCSB entry                                  | 4S32                                 | 4S33                                |
| Space Group                                 | P2 <sub>1</sub>                      | P2 <sub>1</sub>                     |
| Unit Cell Parameters (Å)                    | a=48.96 b=70.0<br>c=59.8<br>∠=109.0° | a=48.8 b=70.4<br>c=61.0<br>∠=109.3° |
| Resolution range<br>(last resolution shell) | 50-1.35<br>(1.37-1.35)               | 50-1.48<br>(1.51-1.48)              |
| Unique Reflections                          | 83034                                | 62605                               |
| Redundancy                                  | 4.7                                  | 4.5                                 |
| Rsym(I) <sup>a</sup> (%)                    | 6.0 (77.2)                           | 4.4 (69.8)                          |
| Completeness                                | 98.3 (97.0)                          | 98.0 (96.0)                         |
| I/σ                                         | 51.6 (1.8)                           | 41.6 (1.7)                          |
| Number of protein atoms                     | 2818                                 | 2811                                |
| Number of solvent atoms                     | 212                                  | 222                                 |
| Number of ANP-PNP atoms                     | 23                                   | 27                                  |
| Number of sulfate atoms                     | 5                                    | 5                                   |
| Number of Mg atoms                          | 1                                    | 1                                   |
| R-factor                                    | 21.1                                 | 19.6                                |
| R-free <sup>b</sup>                         | 24.1                                 | 23.9                                |
| Protein                                     | 32.1                                 | 30.8                                |
| Solvent                                     | 37.5                                 | 36.3                                |
| ANP-PNP                                     | 40.1                                 | 30.5                                |
| Sulfate                                     | 31.6                                 | 42.0                                |
| Mg                                          | 35.3                                 | 29.6                                |
| Bond Length (Å)                             | 0.013                                | 0.014                               |
| Bond Angle (°)                              | 1.54                                 | 1.76                                |
| Favored (%)                                 | 96.5                                 | 95.3                                |
| Allowed (%)                                 | 3.5                                  | 4.7                                 |
| Disallowed (%)                              | 0.0                                  | 0.0                                 |

<sup>a</sup>Rsym(I) =  $\frac{\sum |I - \langle I \rangle|}{\sum I}$ , <sup>b</sup>Test set consists of 5% for all data.

## References

Emsley, P., and Cowtan, K. (2004). Coot: Model-building tools for molecular graphics. *Acta Crystallogr. Sect. D Biol. Crystallogr.* *60*, 2126–2132.

Lamzin, V. S., and Wilson, K. S. (1993). Automated refinement of protein models. *Acta Crystallogr. D. Biol. Crystallogr.* *49*, 129–147.

Murshudov, G. N., Vagin, A. A., and Dodson, E. J. (1997). Refinement of macromolecular structures by the maximum-likelihood method. *Acta Crystallogr. D. Biol. Crystallogr.* *53*, 240–255.

Otwinowski, Z., and Minor, W. (1997). Processing of X-ray diffraction data collected in oscillation mode. *Methods Enzymol.* *276*, 307–326.

Potterton, E., Briggs, P., Turkenburg, M., and Dodson, E. (2003). A graphical user interface to the CCP4 program suite. *Acta Crystallogr. - Sect. D Biol. Crystallogr.* *59*, 1131–1137.
